# Supplementary material for: Mirinho: An efficient and general plant and animal pre-miRNA predictor for genomic and deep sequencing data
Source: PubMed Central journal article supplement (PMC4448272; doi:10.1186/s12859-015-0594-0), 2015-05-29
Supplement: 12859_2015_594_MOESM1_ESM.pdf [file 12859_2015_594_MOESM1_ESM.pdf]

## Supplementary data

MIRINHO: An efficient and general plant and animal miRNA predictor for genomic and deep sequencing data

Susan Higashi, Cyril Fournier, Christian Gautier, Christine Gaspin and Marie-France Sagot

Table S1: Technical information of the current methods for the prediction of miRNAs. Information concerning the corresponding articles, type of software (standalone and/or webserver), and the implemented method. Apart from MIRDEEP2, MIRENA, and MIRNAFOLD, all of the mentioned methods require a learning step.

| Name          | Author / Paper          | Type                    | Method                                        |
|---------------|-------------------------|-------------------------|-----------------------------------------------|
| CID-miRNA     | Tyagi et al. 2008       | Webserver               | Stochastic Context Free Grammar               |
| CSHMM         | Agarwal et al. 2010     | Standalone              | Context-Sensitive Hidden Markov Model         |
| HHMMiR        | Kadri et al. 2009       | Standalone              | Hidden Markov Model                           |
| microPred     | Batuwita et al. 2009    | Standalone              | SVM                                           |
| Mir-BAG       | Jha et al. 2012         | Standalone / Webserver  | naïve Bayes, Best First Decision tree and SVM |
| MiPred        | Jiang et al. 2007       | Webserver               | Random Forest                                 |
| miRanalyser   | Hackenberg et al. 2009  | Webserver               | Random Forest                                 |
| miRDeep2      | Friedlander et al. 2008 | Standalone / Standalone | sRNAseq compatibility with Dicer processing   |
| MIRENA        | Mathelier et al. 2010   | Standalone              | Filtering approach                            |
| miRFinder.4.0 | Huang et al. 2007       | Standalone              | SVM                                           |
| miRNAFold     | Tempel et al. 2012      | Webserver               | Alignment+Filtering approach                  |
| miRPara       | Wu et al. 2011          | Standalone              | SVM                                           |
| miRRim        | Terai et al. 2007       | Standalone              | HMM                                           |
| ProMiR        | Nam et al. 2006         | Webserver               | Probabilistic co-learning model               |
| RNAmicro      | Hertel et al. 2006      | Standalone              | SVM                                           |
| Triplet-SVM   | Xue et al. 2005         | Standalone              | SVM                                           |

Table S2: Experiment to define the most appropriate value for the parameter  $dw$  (diagonal width). The numbers in bold represent the values of  $dw$  with the best sensitivity and precision. The aligned sequences (stem arm candidates) are all 25nt long. The energy threshold used is  $e = -20.6$

|                            | <b>Sensitivity</b><br>(%) | <b>Precision</b><br>(%) | <b>dw</b> |
|----------------------------|---------------------------|-------------------------|-----------|
| <i>A. aegypti</i>          | 38.85                     | 0.02                    | 4         |
|                            | 38.85                     | 0.02                    | <b>5</b>  |
|                            | 39.57                     | 0.02                    | <b>6</b>  |
| <i>A. psium</i>            | 48.78                     | 0.15                    | 4         |
|                            | 49.59                     | 0.15                    | <b>5</b>  |
|                            | 49.59                     | 0.14                    | 6         |
| <i>C. Quinquefasciatus</i> | 41.67                     | 0.06                    | 4         |
|                            | 42.50                     | 0.05                    | <b>5</b>  |
|                            | 42.50                     | 0.05                    | 6         |
| <i>H. melpomene</i>        | 63.37                     | 0.28                    | 4         |
|                            | 63.37                     | 0.27                    | 5         |
|                            | 64.36                     | 0.27                    | <b>6</b>  |
| <i>N. vitripennis</i>      | 65.38                     | 0.01                    | 4         |
|                            | 69.23                     | 0.01                    | <b>5</b>  |
|                            | 69.23                     | 0.01                    | 6         |
| <i>T. castaneum</i>        | 43.45                     | 0.25                    | 4         |
|                            | 43.69                     | 0.24                    | <b>5</b>  |
|                            | 44.42                     | 0.23                    | 6         |

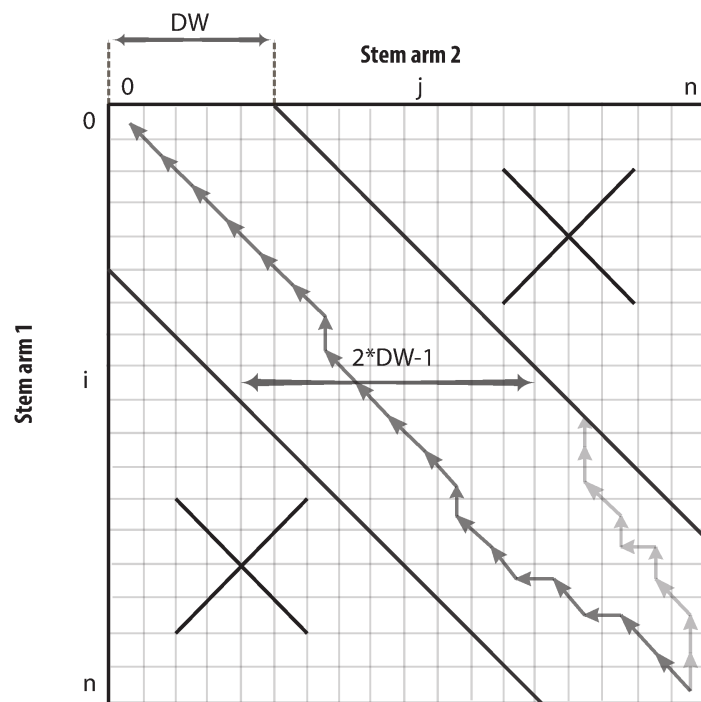

Figure S1: Illustration of the pruning strategy applied to implement the optimised version of MIRINHO.

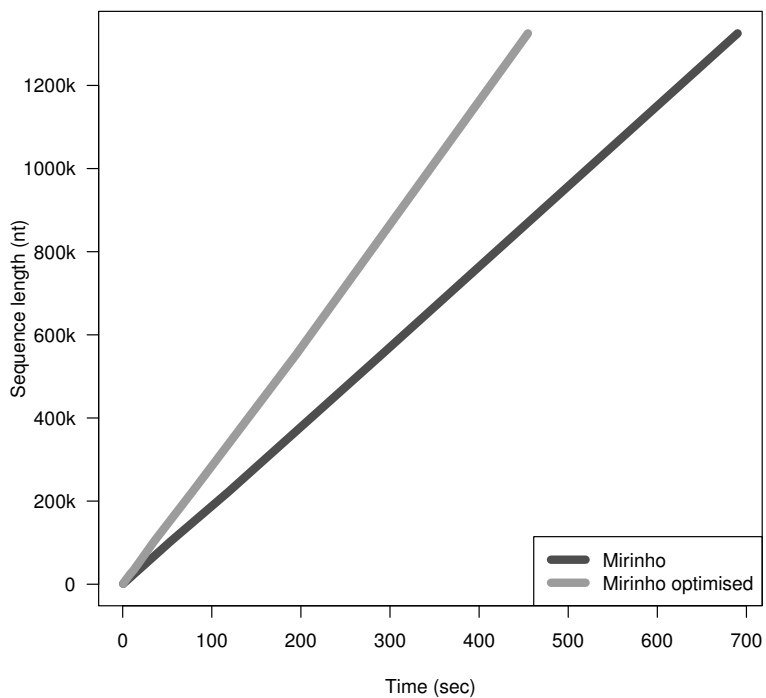

Figure S2: Time comparison between the original and the optimised versions of MIRINHO. The original version consists in using the full DP matrix, while the optimised one uses only the diagonal portion of the same matrix. The times were computed on a Mac OS X Lion 10.7.5, 2.8 GHz Intel Core i7.

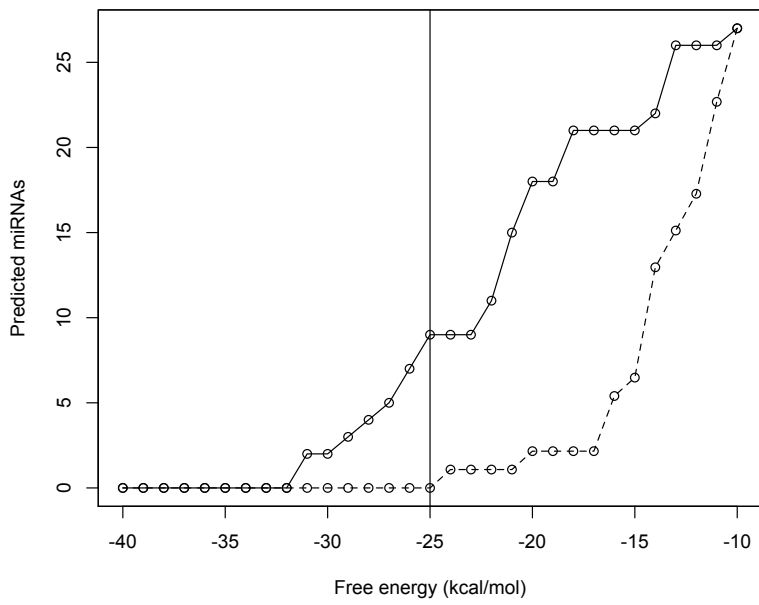

Figure S3: Number of TP miRNAs predicted when using the original and random genomes of *B. taurus*. The energy threshold is  $-25$  kcal/mol.

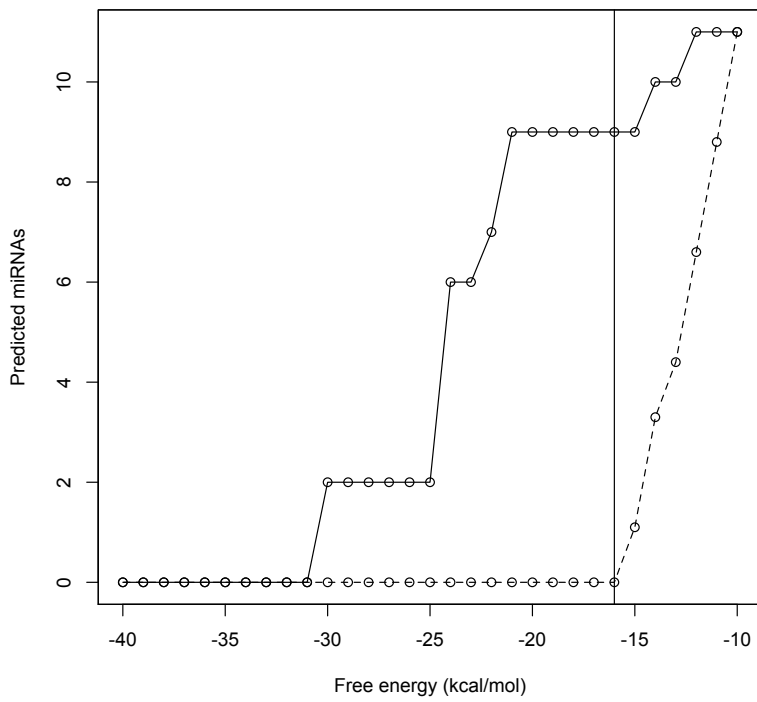

Figure S4: Number of TP miRNAs predicted when using the original and random genomes of *C. briggsae*. The energy threshold is  $-16$  kcal/mol.

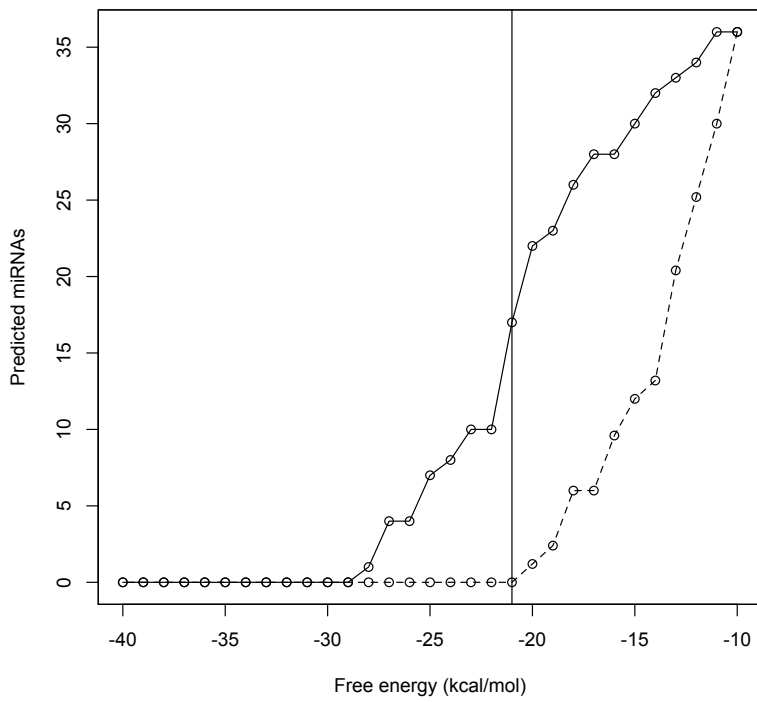

Figure S5: Number of TP miRNAs predicted when using the original and random genomes of *D. simulans*. The energy threshold is  $-21$  kcal/mol.

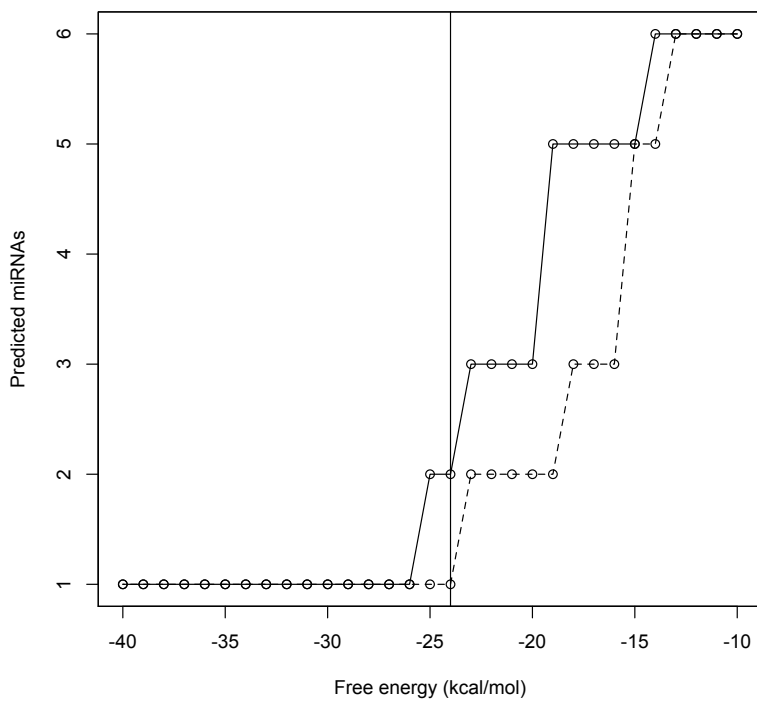

Figure S6: Number of TP miRNAs predicted when using the original and random genomes of *G. gallus*. The energy threshold is  $-24$  kcal/mol.



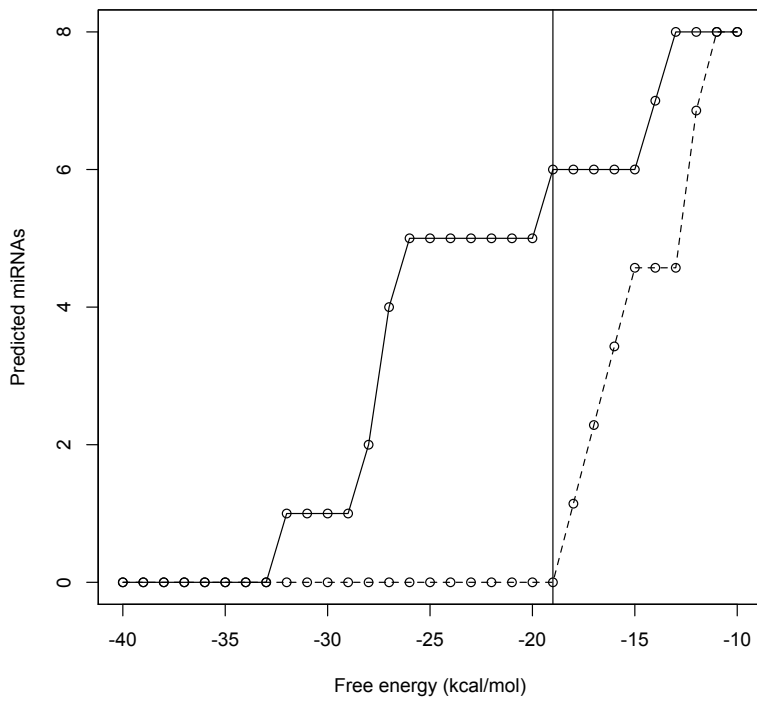

Figure S7: Number of TP miRNAs predicted when using the original and random genomes of *G. gorilla*. The energy threshold is  $-19$  kcal/mol.

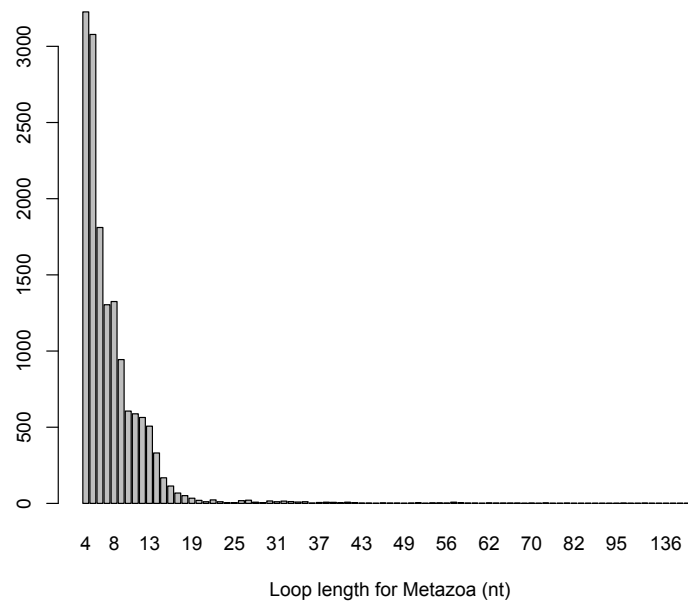

Figure S8: Terminal loop length distribution of the metazoan pre-miRNAs (MIRBASE RELEASE 21).
