# Supplementary material for: Mirinho: An efficient and general plant and animal pre-miRNA predictor for genomic and deep sequencing data
Source: PubMed Central journal article supplement (PMC4448272; doi:10.1186/s12859-015-0594-0), 2015-05-29

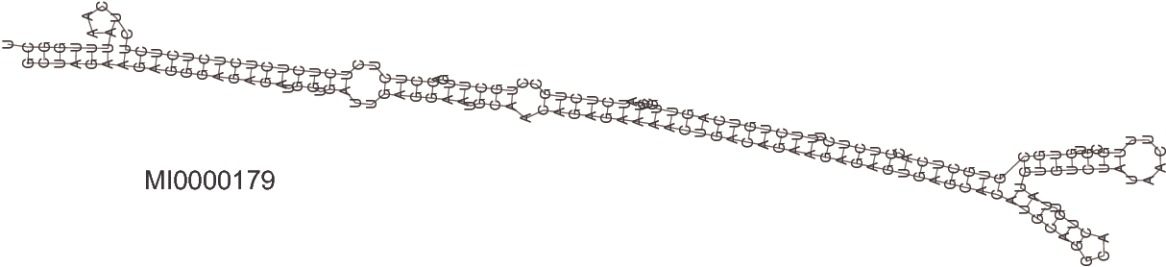

MI0000179



MI0002409

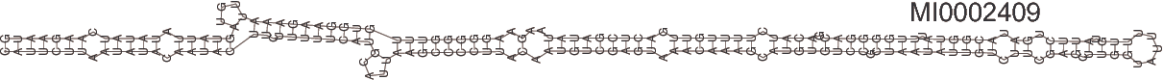

MI0005382

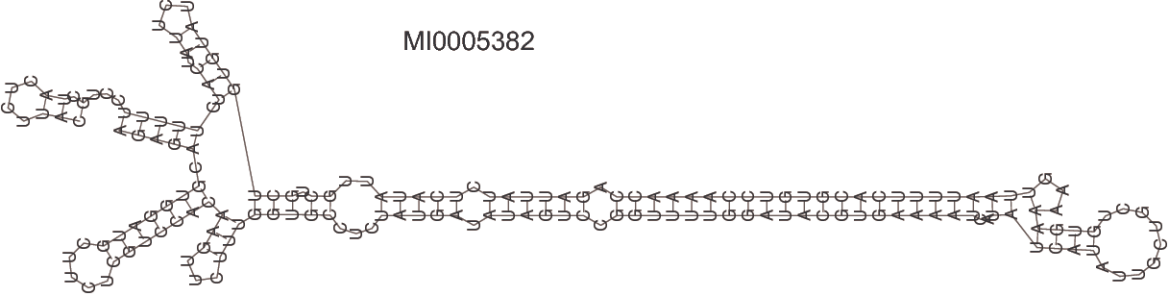



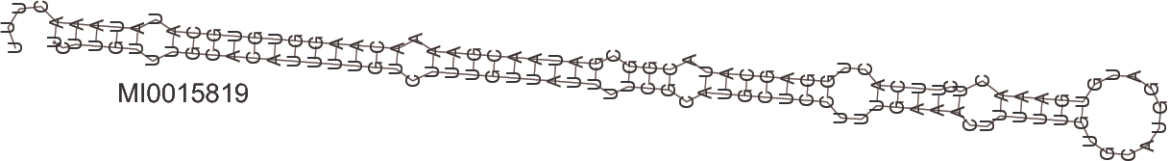

MI0015819

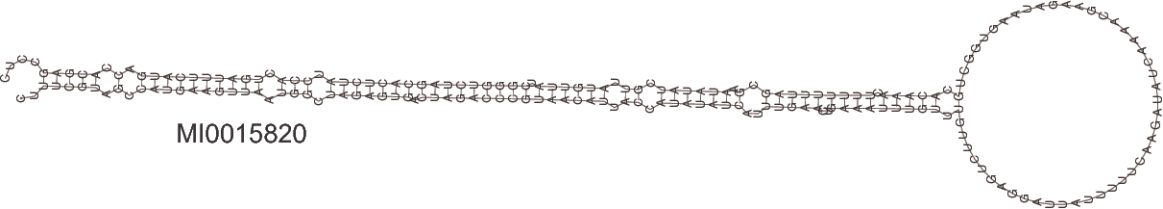

MI0015820

M100017898

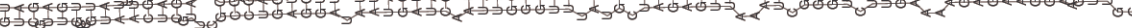

Supplement: 12859_2015_594_MOESM3_ESM.pdf [file 12859_2015_594_MOESM3_ESM.pdf]
