# Supplementary material for: Mirinho: An efficient and general plant and animal pre-miRNA predictor for genomic and deep sequencing data
Source: BMC Bioinformatics. 2015 May 29;16:179. doi: 10.1186/s12859-015-0594-0 (PMC4448272; doi:10.1186/s12859-015-0594-0)
Supplement: Additional file 2 — Secondary structures (MIRBASE, MIRINHO, MIRNAFOLD). Secondary structures as presented in miRBase, and the ones predicted by Mirinho and miRNAFold. [file 12859_2015_594_MOESM2_ESM.pdf]

>MI000179

```
-      - - - -      U  U  UU  -AAU  -A      - - - -A      -      -      AU  G  CU      U
GCUAGA      AGAGGGAGAGA  GG  GA  GAGG      GCA  CAGAGA      AACUGACAGAA  GAGAG  UGAGCAC  GCA  GCA  GUUAUG  G
|||||      |||||      |||  |||  |||      |||  |||  |||      |||  |||  |||      |||  |||  |||
CGGUUU      UCUCUCUCUCU  UC  CU  CUCC      CGU  GUCUCU      UUGACUGUCUU  CUCUC  ACUCGUG  UGU  CGU  CAAUAU  U
U      AAAC      C  U  CU      AGUU  CC      AUCCG      U      C      CG  G  UU      C

G      AGA      U  U  UU  A  U  -  -  -  A  A  A  CU  A  AA  G  U  C  C  U  CA  C  U      CU  -
CUAGA      GGGAGAGA  GG  GA  GAGG  A  G  CAA  CA  G  G  A  A  G  CAG  GA  AG  GAG  A  A  G  GGCA  UG  UAUGUGU  A  U
|||||      |||||      |||  |||  |||      |||  |||  |||      |||  |||  |||      |||  |||  |||
GGUUU      CUCUCUCU  UC  CU  CUCU  U  C  GUU  GU  C  U  U  U  C  GUU  CU  UC  UUU  U  U  C  UCGU  GC  GUGUGCG  U  A
-      AAA      C  U  CU      C  C  A  C  C  G  C  C  AU  C  GA  G  -  C  C  C  AC  -  -      UU  C

      -A  U  -A      - - - -A      AGAGU  - - -CA      G  ACU  UUA  G
      GAGG  A  GCA  CAGAGA      AACUGACAGAAG      GAG      CAUGCA  GC  G  UGU  U
      ||||  |||  |||      ||||  ||||  |||      |||      ||||  |||  |||
      CUCC  U  CGU  GUCUCU      UUGACUGUCUUU      CUC      GUGCGU  UG  U  AUA  C
      AG  U  CC      AUCCG      - - -CU  CACUC      G  CGU  UCA  U
```

>MI0002408

```
C      UU  A  U  U      ACA      A      -      UG  - -U      UUCGAGCUUGGUGUGUUUUUCUAGCCAGCC
CAUUCUUAUAUA  AAUACUAC  UUUC  UCCAU  AA  CCCC UU      AUGUCGAGU  AACGAAGCAUCU  GUCCCC  GUA  UGUC
|||||      |||||      |||  |||  |||      ||||  ||||  |||      |||  |||  |||
GUAAGAGUUAUAU  UUAUGAUG  AAAG  AGGUA  UU  GGGGAA  UAUAGCUCA  UUGUUUUGUAGA  CAGGGG  UAU  ACAG
A      UU  A  U  C      GAA      G      G      UU  UAC      UCUUAUGUUUGUUACUAGUAGCUCUUGA

C      UU  A  U  U      ACA      A      -      U  U  CU  CGAGCUUGGUGUGUUUUUCUAGCCAGCCCC
AUUCUUAUAUA  AAUACUAC  UUUC  UCCAU  AA  CCCC UU      AUGUCGAGU  AACGAAGCAUC  UGUCCCC  GGUA  UGU  U
|||||      |||||      |||  |||  |||      ||||  ||||  |||      |||  |||  |||
UAAGAGUUAUAU  UUAUGAUG  AAAG  AGGUA  UU  GGGGAA  UAUAGCUCA  UUGUUUUGUAG  GCAGGGG  UUAU  ACA  A
A      UU  A  U  C      GAA      G      A      U  U  -C  GUCUUAUGUUUGUUACUAGUAGCUCUUG

      A      -      U  - -U  - - - -UU      UUG  UG  UU  U  CCA
      AUGUCGAGU  AACGAAGCAUCU  GUCCCC  GGUA  UGUC      CGAGC  GUG  U  UUC  AG  GCCC
      ||||  ||||  ||||  ||||  |||      ||||  |||  |||  |||  |||
      UAUAGCUCA  UUGUUUUGUAGA  CAGGGG  UUAU  ACAG      GUUUG  UAC  G  GAG  UC  UGAA
      G      G      U  UAC  UCUUAU      - - -U  UA  UU  C  - -U
```

>MI0002409

```
A      C      U  UU  A  G  U  G      ACA      A      C      -      G  U      CU  G  CUU      U
CAUUCUU  AUUAU  AAUACU  C  UUUC  U  CAU  AA  CCCC UU      AUGUCGAGU  AACAAAG  AUGU  GUCC  C  AAUAUUGU  UC  AG  GGUAU  U
|||||  |||||  |||||  |  ||||  |  |||  ||  |||||      ||||  ||||  |||  |||  |  ||||  |||  |||
```

[illegible]

```

      |||||
UAAAAGCUUU
      |||
      ACU
      |||
      CUU U UCU
      |||
      U UG
      |||||
      UUGAAAGA
      ||
      AG
      |
      A
      |
      A
      |
      C
      ||
      AA
      |||||
      GGCG
      |
      C
      |
      U
      |
      AUAUUAA
      |
      U
      |
      AGAG
      |
      U
      |
      AAGGA
      |
      CC
      |
      U

      CAGACGAUACCA
      C UCAA
      -----C
      A U UU ---UCUC
      GAGAGAGAGAACA
      ACUUU U UCU
      |||||
      UUGCCGC
      GUA AA A AUUCC
      |||||
      UUCUCUCUUUUGU
      UGAAA A AGA
      |||||
      CAGCGGCG
      CGU UU U UAGGC
      -----C
      A --UA
      ACAUCGAAGAA
      G C CC CUCUAUA

```

>MI0015819

```

---UC U C U C UU ACU UG GCA
UUGU UGCACAUUUUGU UUUGUUUUU UCG AUGCUCC UGAA UUU U U
|||||
AAUA ACGUGUGGAACA AAGCAAUAG GGC UACGAGG ACUU AAA G G
UUUCA U A C A UC CUC GU UAG

-UC U C U C UU ACU GCA
UUGU UGCACAUUUUGU UUUGUUUUU UCG AUGCUCC UGAA UUUUGU U
|||||
AAUA ACGUGUGGAACA AAGCAAUAG GGC UACGAGG ACUU AAAGUG G
UCA U A C A UC CUC -UA

      U C U C UU -AC UGUG U
      UUGU UGCACAUUUUGU UUUGUUUUU UCG AUGCUCC UGAA UUUU CA G
      |||||
      AAUA ACGUGUGGAACA AAGCAAUAG GGC UACGAGG ACUU AAAG GU G
      U A C A UC CUC ---U A

```

>MI0015820

```

--CU A C A C A - U C CAU AA UUU UCUGAGGAUUUUUUUCAAGAU
UUCGU G CAUGAAGUUA UGG UAGAGUG CUAGACCCG UAACAU AC AUAUUA UUG CUGAAA GUUUGU A
|||||
GAGCA C GUACUUUAGU ACC AUCUCAC GAUCUGGGC AUUGUA UG UAUUAU AGC GAUUUU CAAACA U
CUCC C A C U - U U C --- -- UUU CGUCGGUGAAUAGAAGCAAAAC

GGC A C A - A A G CGC - AAA GCAGCCACUUAUCUUCGUUUUGAU
UCGUGGUCAUGAA U AGUGG UAGAGU GCUAGACCCG UAACAU AC AUAUUAU U AA AAGUUUGU A
|||||
AGCAUCGGUACUU A UUACC AUCUCA UGAUCUGGGC AUUGUA UG UAUUAUAG A UU UUUAAACA U
GAA C A G C - A G UAA C GAC -AACAAGACUCCUAAUAAAAAGUU C

      - A C CAUUUGAA UUU UCU AG A CAAGAU

```

>MI0017898

U A UAU C AA C C AA -A --A U  
 AGGA AAUGAUC AUUGGGUU G UAGAGUU AU GGGU UUGA AG GAAGGA GU G  
 UUUU UUUUUU UAACCCAA C AUCUCAA UA CCGA GACU UC UUUCCU CG A  
 U C CUU A CC U C CC UA CAG U

>MI0019217

A C G A C A U GUAACUAACAACUGUUUUUGUCCUUAACCA  
 GUUGACUUCUAAUUUAAC UAUAA UUAUCGUUGAC CGGCCAAAU GACUCACC UUAACACUUCUUAACAGC CUCCUAACAGC A  
 |||||  
 CAACUGAAGAUUAAAUUG AUAAU AAUAGCAACUG GUCGGUUUA CUGAGUGG AAUUGUGAGGAAUUGUCG GAGGAUUGUCG C  
 A U A G C U C C GAAUGUUUUUGUACCGGAUUGUCGGCAAUAG  
  
 A C G A C A U GUAACUAACAACUGUUUUUGUCCUUAACCA  
 GUUGACUUCUAAUUUAAC UAUAA UUAUCGUUGAC CGGCCAAAU GACUCACC UUAACACUUCUUAACAGC CUCCUAACAGC C  
 |||||  
 CAACUGAAGAUUAAAUUG AUAAU AAUAGCAACUG GUCGGUUUA CUGAGUGG AAUUGUGAGGAAUUGUCG GAGGAUUGUC G  
 - U A G C U C C AAUGUUUUUGUACCGGAUUGUCGGCAAUAG  
  
 A U -GUA -U ACU --UU C AAC  
 GACUCACC UUAACACUUCUUAACAGC CUCCUAACAGC AC AAC GUUU GUC UUA C  
 |||||  
 CUGAGUGG AAUUGUGAGGAAUUGUCG GAGGAUUGUCG UG UUGU CGGA CGG AAU A  
 C C GCAA UU -AC UUGU C AGC

>MI0019239

```
U      A      A      U      AUAACUAACAACUGUUUUCGUCCUAAACCA
UGACCC GCCAAAUCGACUCACCGUUA ACUUCUUAACAGC CUCCUAACAGC A
||||| ||||||||||||||||||| ||||||||||| |||||||||||
ACUGGG CGGUUUAGCUGAGUGGCAAU UGAGGAAUUGUCG GAGGAUUGUC C
A      C      G      C      GCAAUGUUUUGUACCGGAUUGUCGACAAUAG

U      A      A      U      - AUAACUAACAACUGUUUUCGUCCUAAACC
UGACCC GCCAAAUCGACUCACCGUUA ACUUCUUAACAGC CUCCUAACAG C A
||||| ||||||||||||||||||| ||||||||||| ||||||||||| | A
ACUGGG CGGUUUAGCUGAGUGGCAAU UGAGGAAUUGUCG GAGGAUUGUC G C
-      C      G      C      G CAAUGUUUUGUACCGGAUUGUCGACAAUAG

      A      U      -AUA -U ACU --UC CC AAC
GCCAAAUCGACUCACCGUUA ACUUCUUAACAGC CUCCUAACAGC AC AACA GUUU GU UUA C
||||| ||||||||||||||||||| ||||||||||| ||| ||| ||| A
CGGUUUAGCUGAGUGGCAAU UGAGGAAUUGUCG GAGGAUUGUCG UG UUGU CGGA CG AAU A
      G      C      GCAA UU -AC UUGU AC AGC
```
